# Supplementary material for: Maximising sustainable nutrient production from coupled fisheries-aquaculture systems
Source: PLOS journal article supplement (doi:10.1371/journal.pstr.0000005), 2022-03-01
Supplement: S1 (10.1371/journal.pstr.0000005.s001) [file journal.pstr.0000005.s001]

## Sheet: Sheet1
Analysis	Figure	Key statistic	Value	Reference	Full Reference
Scottish salmon production	1a	Scottish salmon production volume (1999-2020)	Fig. 1	58	Marine Scotland Science. Scottish Fish Farm Production Survey 2019. (2020). https://www.gov.scot/publications/scottish-fish-farm-production-survey-2019/pages/5/
	1a,b	Scottish salmon production volume (2014)	179,022 t	58	Marine Scotland Science. Scottish Fish Farm Production Survey 2019. (2020). https://www.gov.scot/publications/scottish-fish-farm-production-survey-2019/pages/5/
	1b	Fish oil volume in Scottish salmon (2014)	33,000 t	26	Shepherd, C. J., Monroig, O. & Tocher, D. R. Future availability of raw materials for salmon feeds and supply chain implications: The case of Scottish farmed salmon. Aquaculture. 467, 49-62 (2017).
		Fish meal volume in Scottish salmon (2014)	55,000 t	26	Shepherd, C. J., Monroig, O. & Tocher, D. R. Future availability of raw materials for salmon feeds and supply chain implications: The case of Scottish farmed salmon. Aquaculture. 467, 49-62 (2017).
		Fish oil yield from wild-caught fish (global industry average)	0.048	27	IFFO. Fish in: Fish Out (FIFO) ratios for the conversion of wild feed to farmed fish, including salmon. Fish in: Fish Out (FIFO) ratios https://www.iffo.com/fish-fish-out-fifo-ratios-conversion-wild-feed (2017).
		Fish meal yield from wild-caught fish (global industry average)	0.225	27	IFFO. Fish in: Fish Out (FIFO) ratios for the conversion of wild feed to farmed fish, including salmon. Fish in: Fish Out (FIFO) ratios https://www.iffo.com/fish-fish-out-fifo-ratios-conversion-wild-feed (2017).
		Proportion of trimmings in FMFO (global industry average)	0.33	27	IFFO. Fish in: Fish Out (FIFO) ratios for the conversion of wild feed to farmed fish, including salmon. Fish in: Fish Out (FIFO) ratios https://www.iffo.com/fish-fish-out-fifo-ratios-conversion-wild-feed (2017).
		Proportion of trimmings in FMFO (EU average)	0.47	64	European Commission. European Market Observatory for Fisheries and Aquaculture Products (EUMOFA) Monthly Highlights No. 1. 2020 (2020).
		Proportion of trimmings in FMFO (Scottish salmon)	0.24	48-52	Calculated (weighted average) using data from the same sources as Table S2.
FMFO feed in Scottish salmon	1c	FMFO volumes in major Scottish salmon feed producers	Table S2	-	-
		FMFO species composition in major Scottish salmon feed producers	Table S2
Nutrient composition and production	2	Species nutrient concentrations	Table S4
Diet scenarios	4a	Salmon production and wild-caught fish volumes (2014)	Fig. 1
	4b	Micronutrient concentration of diet scenarios	Fig. 2, Table S4
	4c	Salmon production and wild-caught fish volumes (2014)	Fig. 1
Global FMFO use	5a	Wild-caught fish reduced to FMFO (2016)	15 Mt	72	FAO. The State of World Fisheries and Aquaculture 2018 - Meeting the sustainable development goals. (2018). Rome. Licence: CC BY-NC-SA 3.0 IGO. http://www.fao.org/3/I9540EN/i9540en.pdf
		Wild-caught fish proportion of total fish used in FMFO	0.67	27	IFFO. Fish in: Fish Out (FIFO) ratios for the conversion of wild feed to farmed fish, including salmon. Fish in: Fish Out (FIFO) ratios https://www.iffo.com/fish-fish-out-fifo-ratios-conversion-wild-feed (2017).
		FMFO production and use by aquaculture and other industries (2016)	Table S5	-
		Seafood production using commercial aquafeed (2016)	Table S6	-
	5b	Proportion of fish oil from trimmings	0.4	1	FAO. The State of World Fisheries and Aquaculture 2020. (FAO, 2020). doi:10.4060/ca9229en.
		Proportion of fishmeal from trimmings	0.22	1	FAO. The State of World Fisheries and Aquaculture 2020. (FAO, 2020). doi:10.4060/ca9229en.
		Proportion of wild-fish consumed directly	0.24	Fig. 4
		Reallocation of FMFO after limiting salmon to trimmings-only FMFO	Table S7	-
Table S1 | Data sources and key statistics.
